# Supplementary material for: Crimean-Congo Hemorrhagic Fever Knowledge, Attitudes, Practices, Risk Factors, and Seroprevalence in Rural Georgian Villages with Known Transmission in 2014
Source: PubMed Central journal article supplement (PMC4918973; doi:10.1371/journal.pone.0158049), 2016-06-23
Supplement: pone.0158049.s001.pdf [file pone.0158049.s001.pdf]

# **Crimean-Congo Hemorrhagic Fever Knowledge, Attitudes, and Practices Survey**

October 2014  
Tbilisi, Georgia



**LABEL**

## SURVEY

LABEL

### ***Introduction***

Note: When administering the following survey, do not prompt any of the multiple choice answers; please have the participant state their own answers.

**To the interviewee:** “Thank you for being willing to participate in this survey. I am going to start by asking you basic questions about yourself to get to know you better. Please note that your name and any other identifying information will not be collected during this survey. If you want to have the survey stopped at any time or for any reason, please tell us immediately.”

### ***Demographics***

1. Date of birth (DD/MM/YYYY): \_\_\_\_\_
2. Sex:
  - a. Male
  - b. Female
3. Nationality:
  - a. Georgian
  - b. Azery
  - c. Armenian
  - d. Other: \_\_\_\_\_
4. Residence:
  - a. Rural
  - b. Urban
5. Household Size (including the participant): \_\_\_\_\_
6. Are you registered to vote?
  - a. Yes
  - b. No
7. Highest education level: (one answer only)
  - a. Elementary
  - b. Secondary
  - c. Vocational
  - d. Higher
  - e. None

- f. Other: \_\_\_\_\_
8. What daily activity do you perform for greater than 6 hours a day? (circle one answer only)
- a. Farmer
  - b. Herder
  - c. Gardening/Work in the Field
  - d. Slaughterhouse worker
  - e. Butcher
  - f. Healthcare worker
  - g. Veterinarian
  - h. Work in an office
  - i. Other \_\_\_\_\_
9. What is your monthly household income?
- a. <100 Lari
  - b. 100-500 Lari
  - c. 501-1000 Lari
  - d. 1001-1500 Lari
  - e. 1501-2000 Lari
  - f. 2001-3000 Lari
  - g. >3001 Lari
  - h. I don't know
10. Do you receive social security?
- a. Yes
  - b. No
11. How much land do you own?
- a. I rent the land
  - b. <1000m<sup>2</sup>
  - c. 1000-2000m<sup>2</sup>
  - d. 2001-3000m<sup>2</sup>
  - e. 3001-4000m<sup>2</sup>
  - f. 4001-8000m<sup>2</sup>
  - g. >8000m<sup>2</sup>

***Risk Factors***

12. Do you own or take care of animals? (circle all the apply)
- a. No
  - b. If yes, what type?
    - i. Sheep
    - ii. Goats
    - iii. Cattle
    - iv. Buffalo
    - v. Chickens
    - vi. Horses
    - vii. Donkeys

viii. Other \_\_\_\_\_

13. In the last four months, have you performed the following activities (circle all the apply):

- a. Herding
  - i. No
  - ii. Sheep
  - iii. Goats
  - iv. Cattle
  - v. Buffalo
  - vi. Other \_\_\_\_\_
- b. Have you assisted an animal birth?
  - i. Have assisted in animal birthing but have used PPE (gloves, gowns, boots)
  - ii. Have assisted in animal birthing but have **not** used PPE
  - iii. Have not assisted in animal birthing
- c. Slaughtering
  - i. No
  - ii. Sheep
    - 1. Slaughter sheep using PPE (gloves, gowns, boots)
    - 2. Slaughter sheep without PPE (gloves, gowns, boots)
  - iii. Goats
    - 1. Slaughter goats using PPE (gloves, gowns, boots)
    - 2. Slaughter goats without PPE (gloves, gowns, boots)
  - iv. Cattle
    - 1. Slaughter cattle using PPE (gloves, gowns, boots)
    - 2. Slaughter cattle without PPE (gloves, gowns, boots)
  - v. Buffalo
    - 1. Slaughter buffalo using PPE (gloves, gowns, boots)
    - 2. Slaughter buffalo without PPE (gloves, gowns, boots)
  - vi. Other \_\_\_\_\_
    - 1. Slaughter animals using PPE (gloves, gowns, boots)
    - 2. Slaughter animals without PPE (gloves, gowns, boots)
- d. Butchering/handling raw meat
  - i. No
  - ii. Sheep
  - iii. Goats
  - iv. Cattle
  - v. Buffalo
  - vi. Other \_\_\_\_\_
- e. Handled ticks with bare hands
  - i. No
  - ii. Removed ticks from animal and threw is out
  - iii. Removed ticks from animals and killed with bare hands
  - iv. Removed ticks from yourself and threw it out

- v. Removed ticks from yourself and killed with bare hands
- vi. Other \_\_\_\_\_
- f. Worked in a health care setting
  - i. No
  - ii. Primary healthcare
  - iii. Clinic
  - iv. Hospital
  - v. Other \_\_\_\_\_
- g. Drank unpasteurized milk
  - i. Yes
  - ii. No
- h. Gardening
  - i. Yes
  - ii. No
- i. Any other outdoor activity not previously asked:
  - i. None
  - ii. Hiking
  - iii. Camping
  - iv. Hunting
  - v. Fishing
  - vi. Picnicking outside
  - vii. Other \_\_\_\_\_

14. In the last four months, have you had a tick bite?

- a. No
- b. Yes, describe each situation:

| Date of Tick Bite<br>(MM/YYYY) | Where?<br>(village/rayon/region) | Where?<br>(body location) | How much time did it take<br>to get it removed after it<br>was found? |
|--------------------------------|----------------------------------|---------------------------|-----------------------------------------------------------------------|
|                                |                                  |                           |                                                                       |
|                                |                                  |                           |                                                                       |
|                                |                                  |                           |                                                                       |
|                                |                                  |                           |                                                                       |

15. Any travel or migration outside your rayon in the last four months?

- a. No
- b. Yes, describe:

| Location (village/rayon/region) | Reason | Dates |
|---------------------------------|--------|-------|
|                                 |        |       |
|                                 |        |       |
|                                 |        |       |
|                                 |        |       |

16. Were you visited by the household educational campaign last few months?

- a. Yes

- b. No
- c. I don't remember

## KAP Information

Reminder: When administering the survey, do not prompt any of the multiple choice answers; please have the participant state their own answers.

**To the interviewee:** "Now I am going to ask you questions regarding what you know about Crimean-Congo Hemorrhagic Fever and what you do to protect yourself and your animals."

### *Knowledge*

17. Have you ever heard about Crimean-Congo Hemorrhagic Fever, also known as CCHF?
- a. Yes (proceed to question 2)
  - b. No (proceed to **Attitudes section**)
  - c. I don't know
18. Where have you learned/heard about CCHF? (circle all that apply)
- a. School
  - b. Media
    - i. TV
    - ii. Radio
    - iii. Newspaper/Magazines
    - iv. Pamphlets
      - 1. Where did you receive it? \_\_\_\_\_
    - v. Posters
      - 1. Where did you see it? \_\_\_\_\_
  - c. Educational campaign last few months (July-October)
  - d. Training courses
  - e. Health care worker
  - f. Know someone who had CCHF
    - a. Who? \_\_\_\_\_
  - g. I don't know
  - h. Other \_\_\_\_\_
19. What are ways in which a human can become infected? (circle all that apply)
- a. Bite from a tick
  - b. Crushing a tick with bare hands
  - c. Contact with blood from infected animals
  - d. Contact with birthing tissues/fluids from infected animals
  - e. Eating raw, infected meat
  - f. Contact with blood from people sick from CCHF
  - g. Drinking unpasteurized milk
  - h. I don't know

- i. Other \_\_\_\_\_
20. What activities can put you at risk of getting the disease? (circle all that apply)
- a. Working with livestock
  - b. Working in produce/vegetable/grain fields
  - c. Working in the garden
  - d. Working in a rural, woody area
  - e. Slaughtering animals
  - f. Butchering meat
  - g. Working in a hospital
  - h. Being a abattoir/slaughterhouse worker
  - i. Working as a veterinarian
  - j. Working as a health care worker
  - k. I don't know
  - l. Other \_\_\_\_\_
21. What are the signs and symptoms of CCHF? (circle all that apply)
- a. Fever
  - b. Headache
  - c. Nausea/Vomiting
  - d. Diarrhea
  - e. Muscle pain
  - f. Joint pain
  - g. Weakness
  - h. Cough
  - i. Blood in the urine
  - j. Blood in the stool (black or bright red)
  - k. Coughing blood
  - l. Red eyes
  - m. I don't know
  - n. Other \_\_\_\_\_

### ***Attitudes***

22. Do people frequently get bitten by ticks in your community?
- a. Yes
  - b. No
  - c. I don't know
23. Do you think ticks are a problem in your community?
- a. Yes
  - b. No
  - c. I don't know
24. Do you think there are more ticks this year than previously?
- a. Yes
  - b. No

- c. I don't know
- 25. Do you think CCHF is a problem in your community?
  - a. Yes
  - b. No
  - c. I don't know
- 26. Do you think CCHF is something you should be worried about?
  - a. Yes
  - b. No
  - c. I don't know
- 27. Do you think you can protect yourself from CCHF?
  - a. Yes
    - i. How? \_\_\_\_\_
  - b. No
  - c. I don't know

### ***Practices***

- 28. Do you have any interaction with ticks during your **job**?
  - a. Yes
    - i. Please describe \_\_\_\_\_
  - b. No
- 29. Do you have any interaction with ticks at **home**?
  - a. Yes
    - i. Please describe \_\_\_\_\_
  - b. No
- 30. If you interact with ticks, what method do you use to remove ticks off **yourself**?  
(circle only one answer)
  - a. Remove by hand
  - b. Remove with tweezers
  - c. Go to a hospital/health care center
  - d. I don't interact with ticks
  - e. I don't remove ticks
  - f. Other \_\_\_\_\_
- 31. What do you do to protect **yourself** from ticks/CCHF? (circle all that apply)
  - a. Protective clothing (i.e. long pants, socks, etc.)
    - i. How often? Always   Sometimes   Never
  - b. Treat your clothing with repellent
    - i. How often? Always   Sometimes   Never
  - c. Insect repellent on yourself
    - i. How often? Always   Sometimes   Never
  - d. Use pesticides in the environment
    - i. How often? Always   Sometimes   Never
  - e. Avoid woody/rural areas



- i. How often? Always Sometimes Never
  - f. Nothing
  - g. I don't know
  - h. Other \_\_\_\_\_
    - i. How often? Always Sometimes Never
- 32. What care would you seek, if any, if you experienced symptoms of CCHF (fever, muscle aches, nausea/vomiting, bloody stools or urine, etc.)? (circle one answer only)
  - a. Go to a hospital/healthcare facility
    - i. Primary healthcare
    - ii. District
    - iii. Regional
    - iv. Tbilisi ID hospital (IPC)
    - v. Any other clinic in Tbilisi: \_\_\_\_\_
    - vi. Other: \_\_\_\_\_
  - b. Stay at home
  - c. Try local pharmacy
  - d. Go to a local healer
  - e. Nothing
  - f. Other \_\_\_\_\_

The following questions refer to livestock; if the participant said NO to **Question 12**, skip to the question below and proceed to the **Educational Campaign** section.

- 33. How do you prevent ticks for your animals? (circle all that apply)
  - a. Use insecticides/acaricide
    - i. Spray
    - ii. Pour on
    - iii. Other \_\_\_\_\_
  - b. Injectable medication
  - c. Nothing
  - d. Other \_\_\_\_\_
- 34. What method do you use to remove ticks off your livestock? (circle one answer only)
  - a. Remove by hand
  - b. Remove with tweezers
  - c. Go to a veterinarian
  - d. Pour liquid/mixture onto the tick/animal
    - What kind?
      - i. Oil
      - ii. Alcohol
      - iii. Insecticide
      - iv. Other \_\_\_\_\_
  - e. There's never been a tick on my animal(s)

- f. Nothing
- g. Other \_\_\_\_\_

## Educational Campaign

Note: If the participant answered no to **Question 16** and/or is not from the following regions, skip this section and proceed to the **Past Illness** section.

Please check which one applies:

- Samtskhe-Javakheti Region
  - Borjomi
- Shida Kartli Region
  - Khashrui
- Shida Kartli Region
  - Kreli, Gori, Kaspi

**To the interviewee:** “Now I am going to ask you questions about the educational campaign that was performed recently regarding Crimean-Congo Hemorrhagic Fever.”

35. Has your understanding of CCHF changed since the educational campaign? (circle all the apply)
- a. Yes
    - i. I understand how CCHF is transmitted
    - ii. I understand the signs and symptoms
    - iii. I know ways to protect myself/others
    - iv. Other \_\_\_\_\_
  - b. No
    - i. The information was not useful
    - ii. I didn't understand the information
    - iii. I already knew all about CCHF
    - iv. Other \_\_\_\_\_
  - c. I don't know
36. Has your perception of CCHF changed since the educational campaign? (circle all that apply)
- a. Yes
    - i. I am more aware of CCHF
    - ii. I am aware this is a problem in the community
    - iii. I am aware this is a problem in Georgia
    - iv. I believe protective equipment/procedures are important
    - v. I am aware that CCHF can be dangerous
    - vi. I am concerned about my safety
    - vii. I am concerned about my family/community's safety
    - viii. I am concerned about my job

- ix. Other \_\_\_\_\_
  - b. No
    - i. The information was not useful
    - ii. I didn't understand the information
    - iii. I already knew all about CCHF
    - iv. Other \_\_\_\_\_
  - c. I don't know
37. Has the way you protect yourself changed since the educational campaign? (circle all that apply)
- a. Yes
    - i. I wear long shirts/long pants
    - ii. I use repellent
    - iii. I use insecticides
    - iv. I avoid outdoor/woody areas
    - v. Other \_\_\_\_\_
  - b. No
    - i. The information was not useful
    - ii. I didn't understand the information
    - iii. I already knew how to protect myself
    - iv. I don't like wearing protective clothing
    - v. I don't like using repellent
    - vi. I don't like using insecticides
    - vii. Other \_\_\_\_\_
  - c. I don't know
38. Has the way you interact with ticks for both yourself and livestock changed since the educational campaign? (circle all that apply)
- a. Yes
    - i. I don't handle ticks with my bare skin
    - ii. I remove ticks immediately
    - iii. I use repellent
    - iv. I use insecticides
    - v. I use injections
    - vi. I consult a healthcare worker
    - vii. I consult the veterinarian
    - viii. Other \_\_\_\_\_
  - b. No
    - i. The information was not useful
    - ii. I didn't understand the information
    - iii. I already knew how to handle ticks properly
    - iv. Other \_\_\_\_\_
  - c. I don't know

## Past Illness

39. Have you ever been diagnosed with CCHF?
- a. No
  - b. If yes, describe:
    - i. Date:
    - ii. Where were you diagnosed:
    - iii. What symptoms did you have (choose all answers that apply)?
      - a. Fever
      - b. Headache
      - c. Nausea/Vomiting
      - d. Diarrhea
      - e. Muscle pain
      - f. Weakness
      - g. Cough
      - h. Blood in the urine
      - i. Bloody or black stools
      - j. Coughing blood
      - k. Bleeding from the gums
      - l. Other \_\_\_\_\_

**To the interviewee:** "Now I am going to ask about any illnesses you might have had in the last five years"

40. Have you ever had both fever and hemorrhaging at the same time in the last 5 years?
- a. No (Skip question 41, and go to question 42)
  - b. Yes
    - iv. What Date \_\_\_\_\_
    - v. What Symptoms (choose all answers that apply):
      - a. Fever
      - b. Headache
      - c. Nausea/Vomiting
      - d. Diarrhea
      - e. Muscle pain
      - f. Weakness
      - g. Cough
      - h. Blood in the urine
      - i. Bloody or black stools
      - j. Coughing blood
      - k. Bleeding from the gums
      - l. Other \_\_\_\_\_
41. Did you seek any care for your symptoms?

- a. Yes
  - i. Where? \_\_\_\_\_
  - ii. When? \_\_\_\_\_
- b. No
  - i. Why not? \_\_\_\_\_

## Recent Illness

**To the interviewee:** “Now I am going to ask about any illnesses you might have had during the past four months”

- 42. Have you had any illness in the last four months?
  - a. Yes
  - b. No (End questionnaire)

43. What are dates for each illness you had in the last four months? (show calendar)

| Date Started (DD/MM/YYYY) | Date Ended (DD/MM/YYYY) |
|---------------------------|-------------------------|
| 1.                        |                         |
| 2.                        |                         |
| 3.                        |                         |

44. What signs or symptoms did you have during this illness?

| Signs/Symptoms                                                                               | 1 <sup>st</sup> Illness |    | 2 <sup>nd</sup> Illness |    | 3 <sup>rd</sup> Illness |    |
|----------------------------------------------------------------------------------------------|-------------------------|----|-------------------------|----|-------------------------|----|
|                                                                                              | Yes                     | No | Yes                     | No | Yes                     | No |
| Fever                                                                                        |                         |    |                         |    |                         |    |
| Weakness/Lethargy                                                                            |                         |    |                         |    |                         |    |
| Headache                                                                                     |                         |    |                         |    |                         |    |
| Body / muscle pain                                                                           |                         |    |                         |    |                         |    |
| Joint pain                                                                                   |                         |    |                         |    |                         |    |
| Cough                                                                                        |                         |    |                         |    |                         |    |
| Abdominal Pain                                                                               |                         |    |                         |    |                         |    |
| Nausea                                                                                       |                         |    |                         |    |                         |    |
| Vomiting                                                                                     |                         |    |                         |    |                         |    |
| Diarrhea                                                                                     |                         |    |                         |    |                         |    |
| Jaundice (yellowing of the skin)                                                             |                         |    |                         |    |                         |    |
| Bruising                                                                                     |                         |    |                         |    |                         |    |
| Petechiae (small dark purple or dark red dots that don't go away when you push down on them) |                         |    |                         |    |                         |    |
| Nose Bleeding                                                                                |                         |    |                         |    |                         |    |
| Bleeding from gums                                                                           |                         |    |                         |    |                         |    |

|                     |  |  |  |  |  |  |
|---------------------|--|--|--|--|--|--|
| Blood in vomitus    |  |  |  |  |  |  |
| Blood in stool      |  |  |  |  |  |  |
| Blood in urine      |  |  |  |  |  |  |
| Coughing blood      |  |  |  |  |  |  |
| Red Eyes            |  |  |  |  |  |  |
| Bleeding gums       |  |  |  |  |  |  |
| Other, please list: |  |  |  |  |  |  |

45. Did you seek any care for your symptoms?

a. Yes

i. Where? \_\_\_\_\_

ii. When? \_\_\_\_\_

b. No

i. Why not? \_\_\_\_\_ (End questionnaire)

46. If you were hospitalized, how long were you in the hospital for? \_\_\_\_\_

47. Did you receive any medications or treatments?

a. No

b. Yes

i. What? \_\_\_\_\_

ii. Received medication or treatment from (choose one answer only):

a. Primary healthcare

b. District

c. Regional

d. Tbilisi ID hospital

e. Any other clinic in Tbilisi: \_\_\_\_\_

f. Local pharmacy

g. Local healer

h. Other \_\_\_\_\_
